# Supplementary material for: Simulating marine neodymium isotope distributions using ND v1.0 coupled to the ocean component of the FAMOUS-MOSES1 climate model: sensitivities to reversible scavenging efficiency and benthic source distributions
Source: Copernicus journal article supplement (doi:10.5194/egusphere-2022-606), 2022-09-21
Supplement: Supplementary file [file egusphere-2022-606-CC1-supplement.pdf]

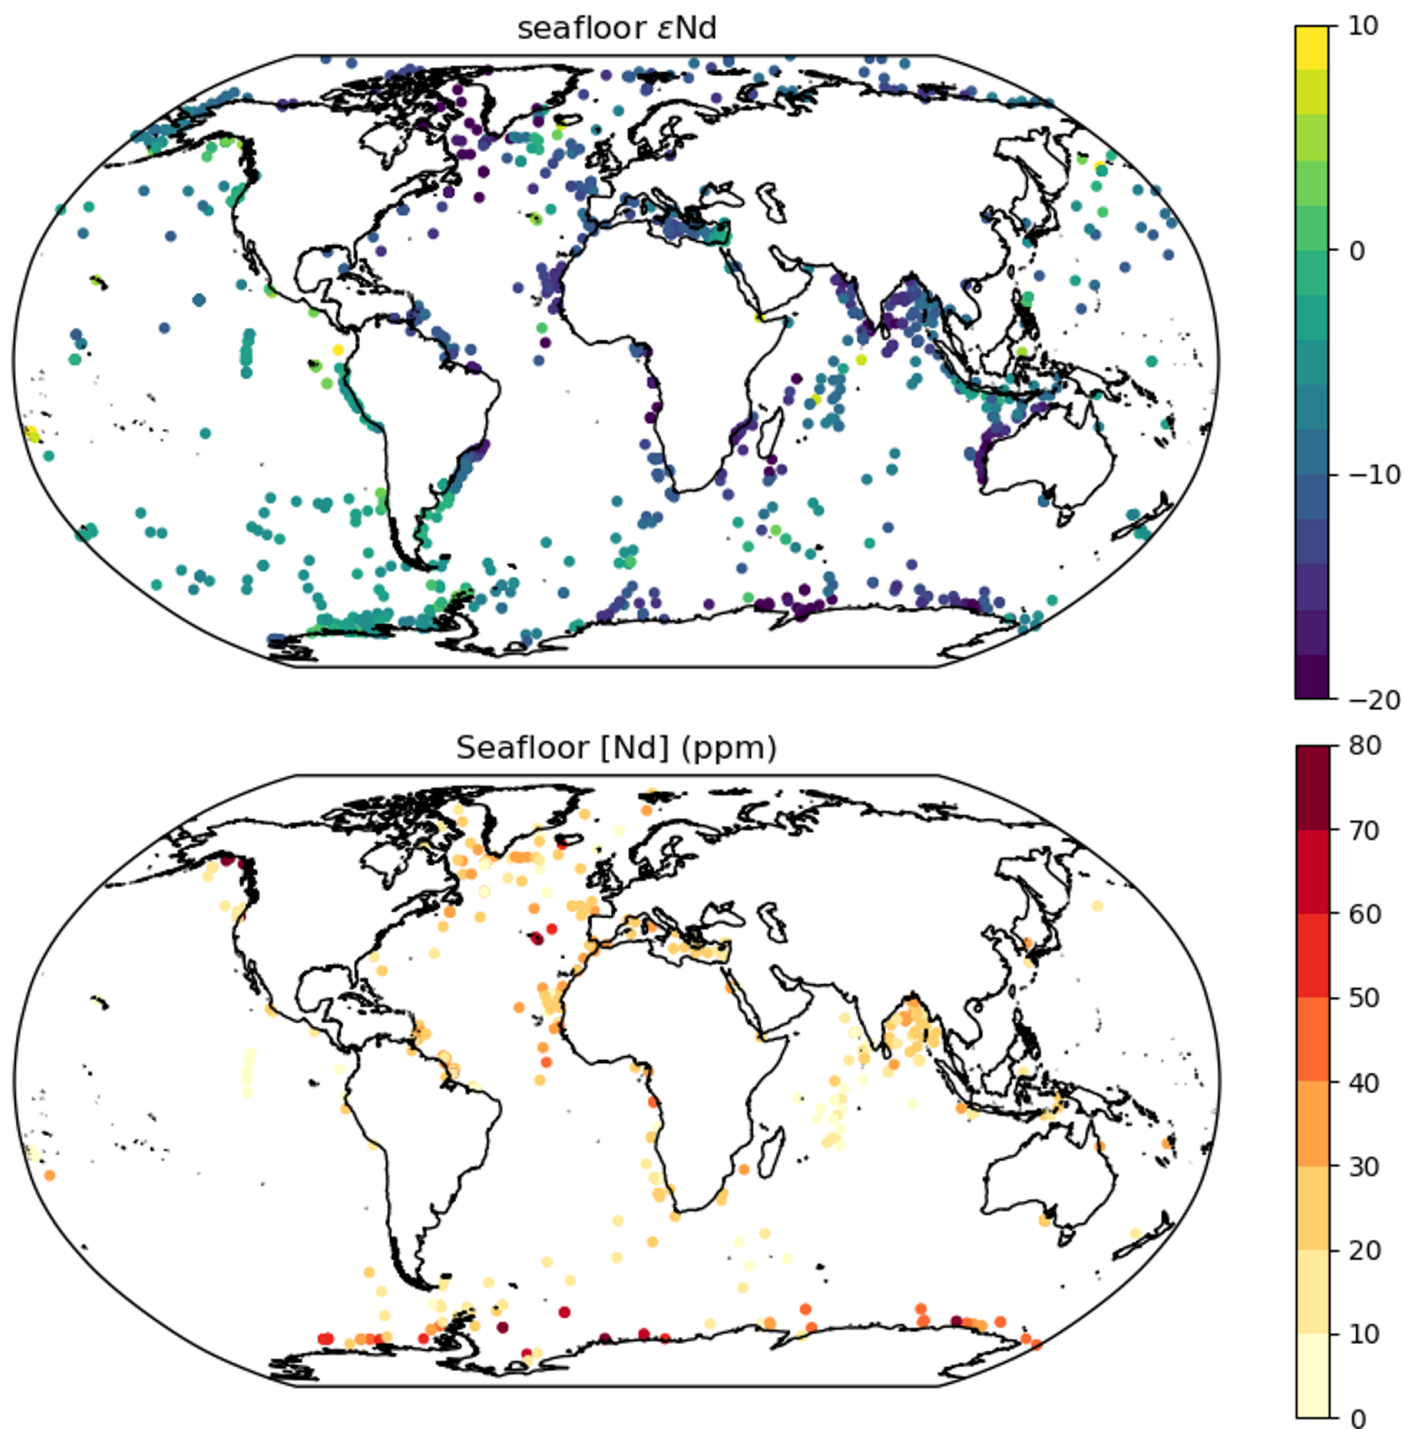

*Figure 1: seafloor  $\epsilon\text{Nd}$  and seafloor Nd concentration provided by Robinson et al. (2021)*
